1 **Title:** Development and clinical validation of a targeted RNAseq panel (Fusion-STAMP) for  
2 diagnostic and predictive gene fusion detection in solid tumors

3  
4 **Short Title:** FFPE fusion detection by RNAseq

5  
6 **Authors:** Erik Nohr<sup>1,2</sup>, Christian A. Kunder<sup>1,2</sup>, Carol Jones<sup>2</sup>, Shirley Sutton<sup>3</sup>, Eula Fung<sup>2</sup>,  
7 Hongbo Zhu<sup>2</sup>, Sharon J. Feng<sup>1</sup>, Linda Gojenola<sup>2</sup>, Carlos D. Bustamante<sup>3,4</sup>, James L. Zehnder<sup>1,2</sup>,  
8 Helio A. Costa<sup>1,2,4\*</sup>

9  
10 **Affiliations:**

11 <sup>1</sup>Department of Pathology, Stanford University School of Medicine, Stanford, CA, 94305 USA

12 <sup>2</sup>Molecular Genetic Pathology Laboratory, Stanford Health Care, Stanford, CA, 94305 USA

13 <sup>3</sup>Department of Genetics, Stanford University School of Medicine, Stanford, CA, 94305 USA

14 <sup>4</sup>Department of Biomedical Data Science, Stanford University School of Medicine, Stanford,  
15 CA, 94305 USA

16 \*Correspondence to: Helio A. Costa, Ph.D. (H.A.C.), Stanford University, Department of  
17 Pathology, 300 Pasteur Drive, MSOB x313, Stanford, CA 94305. Email: hcosta@stanford.edu.

18  
19 **Number of text pages:** 19

20  
21 **Tables:** 3

22  
23 **Figures:** 2

24  
25 **Sources of support:** This research was funded by grants from the National Institutes of Health  
26 (ClinGen 4U01HG007436-04 to C.D.B.; NCI 2P01CA49605 to J.L.Z), and from Stanford  
27 University Department of Pathology to H.A.C.

28  
29 **Disclosure:** C.D.B. is on the scientific advisory boards (SAB) of AncestryDNA, Arc Bio LLC,  
30 Etalon DX, Liberty Biosecurity, and Personalis. C.D.B. is on the board of EdenRoc Sciences  
31 LLC. C.D.B. is also a founder and SAB chair of ARCBio. H.A.C. provides consulting services to  
32 Gerson Lehrman Group LLC. None of these entities played a role in the design, execution,  
33 interpretation, or presentation of this study.

34

35 **Abstract:**

36 RNA sequencing is emerging as a powerful technique to detect a diverse array of fusions in  
37 human neoplasia, but few clinically validated assays have been described to date. We designed  
38 and validated a hybrid-capture RNAseq assay for FFPE tissue (Fusion-STAMP). It fully targets  
39 the transcript isoforms of 43 genes selected for their known impact as actionable targets of  
40 existing and emerging anti-cancer therapies (especially in lung adenocarcinomas), prognostic  
41 features, and/or utility as diagnostic cancer biomarkers (especially in sarcomas). 57 fusion results  
42 across 34 samples were evaluated. Fusion-STAMP demonstrated high overall accuracy with 98%  
43 sensitivity and 94% specificity for fusion detection. There was high intra- and inter-run  
44 reproducibility. Detection was sensitive to approximately 10% tumor, though this is expected to  
45 be impacted by fusion transcript expression levels, hybrid capture efficiency, and RNA quality.  
46 Challenges of clinically validating RNA sequencing for fusion detection include a low average  
47 RNA quality in FFPE specimens, and variable RNA total content and expression profile per cell.  
48 These challenges contribute to highly variable on-target rates, total read pairs, and total mapped  
49 read pairs. False positive results may be caused by intergenic splicing, barcode hopping / index  
50 hopping, or misalignment. Despite this, Fusion-STAMP demonstrates high overall performance  
51 metrics for qualitative fusion detection and is expected to provide clinical utility in identifying  
52 actionable fusions.

53 **Keywords:** RNAseq; FFPE; Tumor Genotyping; Structural Variation; Chromosomal Fusions

54

55

56

57

58 **Introduction:**

59 In human neoplasia, numerous clinically relevant translocations have been described, and  
60 more continue to be identified. Many are specific to one or several diagnoses, especially among  
61 soft tissue neoplasms. In conjunction with clinical history and  
62 histomorphologic/immunohistochemical findings, the detection of one of these translocations is a  
63 valuable diagnostic adjunct<sup>1</sup>. For example, in the setting of a small round blue cell tumor,  
64 translocation testing can help distinguish among differential diagnoses that include Ewing  
65 sarcoma, Ewing-like sarcomas, desmoplastic small round cell tumor, alveolar  
66 rhabdomyosarcoma, and synovial sarcoma, all of which are associated with distinct  
67 translocations or sets of translocations.

68 Other translocations may guide therapeutic decision making to optimally utilize targeted  
69 therapies, particularly in the setting of non-small cell lung carcinoma (NSCLC)<sup>2</sup>. For example,  
70 ALK, ROS1, and RET rearrangements are standard-of-care biomarkers predictive of a response  
71 to an FDA-approved medication in the setting of NSCLC. In addition, evidence is accumulating  
72 for clinical actionability of many other structural rearrangements in NSCLC and other tumors<sup>3-5</sup>.

73 Numerous techniques have been employed to detect fusions<sup>3</sup>. Traditional methods that do  
74 not employ next generation sequencing (NGS) include karyotyping, reverse transcriptase  
75 polymerase chain reaction (RT-PCR), and fluorescent in situ hybridization (FISH). Each of these  
76 methods has specific strengths and limitations. Karyotyping relies on growing cells in culture,  
77 can only detect large-scale alterations, demands significant interpretation time and can suffer  
78 from long turnaround time. RT-PCR is a sensitive and specific technique to test for well-  
79 characterized fusions with stereotyped breakpoints, but suffers from a limited ability to  
80 multiplex, or to detect novel rearrangements. FISH is considered the current gold standard for

81 detecting fusions; though it greatly improves resolution compared to karyotyping, it still suffers  
82 from reduced sensitivity compared to NGS-based methods<sup>6</sup>, especially for small  
83 intrachromosomal events (“cryptic rearrangements”). Furthermore, FISH is unable to determine  
84 more granular details pertaining to fusions, including the fusion breakpoints, involved exons, and  
85 whether the fusion is in-frame or not. There is emerging evidence that these parameters may be  
86 clinically relevant. For example, in one reported cohort of patients with NSCLC positive by  
87 FISH testing for an EML4-ALK rearrangement and treated with ALK inhibitors, upon DNA and  
88 RNA NGS sequencing, patients with a predicted non-productive or no NGS-detectable EML4-  
89 ALK fusion demonstrated significantly worse mean survival compared to those with a predicted  
90 productive rearrangement<sup>7</sup>.

91 In more recent years, NGS-based fusion detection techniques have been developed.  
92 These include genomic DNA sequencing with target enrichment for regions in which breakpoints  
93 occur (such as selected “hotspot” introns)<sup>8,9</sup>, whole-transcriptome RNA sequencing utilizing  
94 poly(A) capture<sup>10</sup>, and targeted RNA sequencing employing hybridization-based capture<sup>11,12</sup> or  
95 anchored multiplex PCR<sup>13</sup>. Broadly speaking, NGS-based techniques offer the advantage of  
96 greater breadth, depth, and resolution compared to traditional methods, with a tradeoff of  
97 increased cost.

98 Fresh tissue offers the best biospecimen quality characteristics for most molecular assays,  
99 but suffers from a lack of convenience, availability, and portability. In both clinical and research  
100 settings, formalin-fixed paraffin-embedded (FFPE) tissue has key advantages. These include  
101 being generated routinely in the clinical workflow and being a stable source of DNA and/or  
102 RNA for years after the tissue is acquired from the patient. In clinical practice, the need for  
103 fusion detection may not become apparent until after specimens are fixed and sections are

104 examined under the microscope by a pathologist; also, the clinical need for fusion detection may  
105 change over time due to changes in the patient's disease status, or evolution of knowledge in the  
106 field. However, FFPE presents significant biospecimen quality challenges to molecular assays  
107 due to chemical modifications including cross-linking which occur to DNA and RNA during  
108 fixation<sup>14,15</sup>. Cross-linking results in fragmentation, which limits the quantity of intact nucleic  
109 acids available for testing, and the obtainable length of NGS sequencing reads.

110 Each NGS-based fusion detection technique has advantages and limitations. Targeted  
111 DNA panels commonly used in cancer profiling can conveniently incorporate fusion detection by  
112 covering "hotspot" breakpoint regions and detecting fusion "spanning" or fusion "straddling"  
113 reads<sup>8,9</sup>. However, these panels can only capture a fraction of possible breakpoints, limited by  
114 intron sizes and fusion breakpoint diversity. Furthermore, targeted DNA panels on FFPE  
115 specimens have difficulties with repetitive or low complexity regions due to short read lengths;  
116 unfortunately, such regions often mediate genomic rearrangements<sup>16</sup>. On the other hand, RNA-  
117 based methods cannot detect rearrangements that do not lead to a fusion transcript, such as those  
118 that upregulate a gene's expression by juxtaposing an enhancer element (eg, rearrangements  
119 involving IGH in some types of lymphoma), and may also miss lowly-expressed fusion  
120 transcripts. However, RNA-based NGS techniques can efficiently detect a diverse range of  
121 fusion breakpoints. Whole-transcriptome RNA sequencing using poly(A) capture on FFPE  
122 specimens for fusion detection has recently been reported<sup>10</sup>. This approach offers a wide breadth  
123 of sequencing and correspondingly a high discovery potential for novel fusions, which may be  
124 especially valuable in a research setting. However, due to RNA fragmentation, sensitivity  
125 decreases with the distance of the breakpoint from the poly(A) tail (ie breakpoints that are more  
126 5' in the fusion transcript suffer from reduced sensitivity)<sup>10</sup>. In addition, increased breadth of

127 sequencing results in detection of more fusions of uncertain clinical significance. Some such  
128 fusions may be relevant but not yet understood, while others are likely to be “passenger fusions”  
129 which are not driving the cancer, but instead relate to copy number alterations or other structural  
130 alterations in cancers with genomic instability<sup>17</sup>. Whole-transcriptome sequencing also suffers  
131 from high cost and a prolonged turnaround time.

132         Currently, genes in which fusions are known to have clinical relevance comprise a small  
133 subset of the exome. A targeted panel enables optimization for cost-effective and sensitive  
134 detection of clinically relevant alterations. We have validated the Stanford Tumor Actionable  
135 Mutation Panel for Fusions (Fusion STAMP), a hybrid-capture based RNAseq assay (run on the  
136 Illumina MiSeq) that fully targets the transcript isoforms of 43 genes selected on the basis of  
137 their known impact as actionable targets of existing and emerging anti-cancer therapies, their  
138 prognostic features, and/or their utility as diagnostic cancer biomarkers. The targeted sequencing  
139 approach and integrated bioinformatics workflow is optimized for sequencing of FFPE tumor  
140 tissue specimens. In total, 34 unique samples (31 patient specimens, 1 purified RNA reference  
141 standard, and 2 RNA-FFPE reference standards [Horizon Discovery]) were tested in parallel by  
142 the Fusion STAMP method and compared to other reference methods to assess accuracy,  
143 yielding 57 fusion results. Reference methods included our in-house validated NGS panel for  
144 solid tumors (Stanford Actionable Mutation Panel; STAMP), validated fluorescence in situ  
145 hybridization (FISH) assays, and external reference testing performed by College of American  
146 Pathologists (CAP)-accredited laboratories. Analytical specificity was assessed using six non-  
147 neoplastic FFPE samples. Analytical sensitivity was assessed through serial dilution of an  
148 EWSR1 fusion cell line and by multiple analyses of the SereSeq Fusion RNA Mix v3 (SeraCare  
149 0710-0431) which includes certified quantification of transcript levels by digital PCR. Intra-run,

150 inter-run, and inter-instrument reproducibility was assessed. Here we describe the validation and  
151 anticipated clinical utility of Fusion STAMP.

152

## 153 **Materials and Methods:**

### 154 *Specimens and nucleic acid extraction*

155 The patient tissue specimens described in this study were obtained from FFPE tissue  
156 blocks from Stanford Health Care. An anatomical pathologist reviewed, diagnosed, and  
157 estimated tumor purity from hematoxylin and eosin (H&E) slides of each specimen. A reference  
158 purified RNA sample (SeraSeq Fusion RNA Mix v3; SeraCare, Cat. No. 0710-0431, Milford,  
159 MA, USA) harboring 14 known fusions targeted by our Fusion-STAMP panel was used as a  
160 positive control for our analyses. A reference FFPE sample with five fusion transcripts (EML4-  
161 ALK, CCDC6-RET, SLC34A2-ROS1, TPM3-NTRK1 and ETV6-NTRK3) confirmed to be  
162 present by endpoint RT-PCR (5-Fusion Multiplex (Positive Control) FFPE RNA Reference  
163 Standard; Horizon Discovery, Cat. No. HD796, Cambridge, UK) and a reference FFPE sample  
164 with the same five fusion transcripts confirmed to be absent by endpoint RT-PCR (5-Fusion  
165 Multiplex (Negative Control) FFPE RNA Reference Standard; Horizon Discovery, Cat. No.  
166 HD783, Cambridge, UK) were also tested. For dilution studies, a cell line containing an EWSR1  
167 fusion (RD-ES (ATCC® HTB-166™); American Type Culture Collection (ATCC), Manassas,  
168 VA, USA) and a B-lymphocyte cell line from a patient with cystic fibrosis (GM07469; Coriell  
169 Institute for Medical Research, Camden, NJ, USA) were used. Total RNA from patient and  
170 control samples were extracted using a Qiagen RNeasy FFPE Kit (Qiagen Inc., Cat. No. 73504,  
171 Germantown, MD, USA), respectively. Additional specimen details can be found in **Table 2**.

172

173 *Fusion-STAMP sequencing sample preparation, sequencing, and fusion detection*

174 Total RNA (200ng input) from each specimen underwent cDNA synthesis and  
175 construction of sequencing libraries using a KAPA Stranded RNA-Seq Library Preparation Kit  
176 (Roche Sequencing, Cat. No. 07277261001, Pleasanton, CA, USA). Five to six samples at a time  
177 were then multiplexed and underwent enrichment for a 43-gene targeted RNA fusion panel  
178 (Table 1) using Roche SeqCap RNA Choice target enrichment probes spanning the entirety of  
179 the gene transcripts of interest (Roche Sequencing, Cat. No. 6953247001, Pleasanton, CA,  
180 USA). Sequencing was then performed on an Illumina MiSeq instrument producing 150bp  
181 paired end reads. In brief, sequencing reads were mapped to the human reference genome  
182 (GRCh38.p12) using the STAR-Fusion algorithm (v 1.1.0). STAR-Fusion uses the STAR  
183 aligner<sup>18</sup> to map reads and identify candidate fusion transcripts, which are then processed by the  
184 STAR-Fusion algorithm to map junction reads and spanning reads to a reference annotation set  
185 and to produce a final fusion transcript list. STAR-Fusion is run with the following parameters:  
186 STAR-Fusion\_v1.1.0/STAR-Fusion --left\_fq <R1.fastq.gz> --right\_fq <R2.fastq.gz> --  
187 genome\_lib\_dir <genome reference directory> --FusionInspector validate --annotate  
188 examine\_coding\_effect --extract\_fusion\_reads. Called variants were annotated for a series of  
189 functional predictions using publicly available database annotations via internal perl scripts.

190

191 *Fluorescent In Situ hybridization (FISH)*

192 FISH analysis was performed on interphase nuclei or metaphase chromosomes with the  
193 corresponding break-apart FISH probe as previously described<sup>19</sup>.

194

195 *Statistical analyses*



196 All statistical analyses were performed in the R programming language.

197

198 **Results:**

199 Overview of Gene Panel Targets

200 Forty-three genes were targeted by Fusion STAMP based on literature review of clinical  
201 utility. Of these, 15 are protein kinases involved in fusions with established or emerging  
202 evidence for clinical actionability with targeted therapies<sup>3</sup>; 31 are involved in fusions with  
203 diagnostic utility; and 9 are involved in fusions with prognostic utility (Table 1). Some targeted  
204 genes are involved in fusions with multiple domains of clinical utility. For example, PAX3-  
205 FOXO1 and PAX7-FOXO1 are diagnostic for alveolar rhabdomyosarcoma, and also portend a  
206 worse prognosis (especially PAX3-FOXO1) compared to embryonal rhabdomyosarcoma and  
207 fusion-negative alveolar rhabdomyosarcoma<sup>20</sup>. Some fusions have differing clinical significance  
208 depending on the tumor type and the translocation partner; for example, NTRK3 fusions occur  
209 across many solid tumor types and may predict response to targeted therapies including  
210 larotrectinib and entrectinib<sup>3</sup>, but ETV6-NTRK3 fusions are diagnostic markers for infantile  
211 fibrosarcoma, congenital mesoblastic nephroma, and secretory carcinoma of the breast and  
212 salivary gland. Overall the selected genes provide clinical utility across multiple scenarios. These  
213 include NSCLC, particularly those negative for a typical MAPK pathway driver mutation;  
214 sarcomas, especially small round blue cell tumors, or others that are difficult to classify; and  
215 select head and neck entities, including certain thyroid and salivary gland tumors.

216

217 Overview of Experimental and Computational Workflow

218

219 The Fusion STAMP workflow includes isolation of total RNA molecules, followed by  
220 efficient preparation of sequencing libraries and a target enrichment approach to capture mRNA  
221 transcript regions of interest for sequencing. The enrichment is done using custom designed  
222 libraries of capture oligonucleotides that target a specific set of expressed genomic regions. This  
223 panel fully targets the major canonical transcript isoforms of the 43 genes described above. The  
224 bioinformatic pipeline includes sequencing quality control, paired-end mapping to the human  
225 transcriptome, and detection of gene fusion events using the STAR-Fusion algorithm. In  
226 addition, quality control metrics and plots are generated from the aligned BAM files. A  
227 molecular genetic pathology fellow or clinical molecular genetics fellow reviews all fusion  
228 variant calls.

229

### 230 Sequencing Metrics and Clinical Reporting Thresholds

231 Sequencing metrics across the 34 tested samples (Table 2) demonstrate significant  
232 variability in on-target rate (range: 28.6 - 93.0%), total read pairs (range: 539,759 – 11,242,774),  
233 mapped read pairs (range: 298,880 – 8,530,449), and insert size (range: 144 – 269 bp) despite  
234 uniform input RNA mass (200 ng) for all specimens.

235 True positive fusions had variable read support in the validation cohort, sometimes <20  
236 junction reads (i.e. a read that aligns as a split read at the site of the putative fusion junction).  
237 Also, in many samples, low numbers of junction reads (generally <20) were identified for  
238 fusions which did not fit in the clinical or biological context, and had not been previously  
239 reported in the literature. These were often adjacent or nearby in the genome (possibly  
240 representing intergenic splicing<sup>21</sup>). Based on the levels of junction read support for true positive  
241 fusions and this presumed noise in the validation data, clinical reporting thresholds were set to

242 optimize performance metrics in the validation cohort. A “whitelist” was created of fusions  
243 which have previously been reported in the literature, and a lower reporting threshold was set for  
244 these fusions. A higher threshold was set for fusions with identical breakpoints to one or more  
245 other multiplexed samples, due to the phenomenon of barcode hopping<sup>22</sup>. For clinical testing,  
246 fusions with supporting junction reads below the reporting threshold that are suspected of being  
247 diagnostically or clinically significant may be confirmed by RT-PCR and Sanger sequencing, or  
248 by another corroborating result (such as FISH).

249

#### 250 Analytical Sensitivity / Limit of Detection, and Analytical Specificity

251 Analytical sensitivity was assessed with six replicates of the Seraseq Fusion RNA Mix  
252 v3, which contains 14 fusion variants whose presence is confirmed and quantitated by digital  
253 PCR. Supporting junction reads for 13 of the 14 fusions were detected in all replicates. There  
254 was not a clear proportional relationship between the ddPCR copy number as reported by  
255 SeraCare (which is based on the number of supportive reads with unique start sites), and the  
256 number of supporting junction reads detected on Fusion STAMP. One fusion (TMPRSS2-ERG)  
257 was not detected in one replicate (1/6; 17%), and junction read support for this fusion was low in  
258 the other replicates. Since this fusion appeared to be near the limit of detection of the Fusion  
259 STAMP assay, detection of this fusion was dropped from QC requirements for clinical testing.

260 Limit of detection was further assessed with a cell line dilution study. Single-replicate  
261 serial dilutions were performed using a cell line with an EWSR1 fusion, and a cystic fibrosis cell  
262 line (Figure 2). Junction read support of  $\geq 20$  reads was demonstrated down to a dilution of  
263 6.25%. Of note, 3 junction reads were detected in the 100% cystic fibrosis cell line sample. This  
264 is below the established reporting threshold and may suggest barcode hopping or trace

265 contamination. Overall, based on this data, the sensitivity of Fusion STAMP is cited as  
266 approximately 10% tumor.

267 Analytical specificity was assessed by testing 6 non-neoplastic tissue FFPE specimens.  
268 No fusions were detected above the reporting threshold in these samples.

269

#### 270 Reproducibility (Precision)

271 Intra-run and inter-run reproducibility were assessed in three replicates each of the  
272 Seraseq Fusion RNA Mix v3 and two clinical samples, one with an EML4-ALK translocation,  
273 and the other with a MYO5C-ROS1 translocation. All fusions in the Seraseq control (excluding  
274 the TMPRSS2-ERG fusion), and the EML4-ALK and MYO5C-ROS1 fusions, were detected  
275 across all replicates.

276

#### 277 Accuracy

278 Fusion STAMP showed excellent accuracy (Table 3). One case was negative by FISH for  
279 USP6 but Fusion STAMP was positive for a COL1A1-USP6 fusion. Given the tumor context (a  
280 fibro-osseous pseudotumor of the digit), this likely represents a false negative result by FISH  
281 testing. Fusion-STAMP is expected to show greater analytical sensitivity than FISH.

282 One case was positive by outside testing for an EML4-ALK rearrangement, but this was  
283 not detected by Fusion STAMP. In this case, the outside lab performed micro-dissection for  
284 tumor enrichment. This was not an option with the material received for Fusion STAMP; this  
285 may account for this false negative result.

286 Of the 43 genes in this panel, 27 are involved in at least one fusion in the validation data  
287 set. Of the remaining 16 genes, many are rarely involved in fusions, making it a challenge to

288 obtain reference material. To demonstrate that the selector was successful in capturing these  
289 transcripts when expressed, we examined the coverage data in appropriate tissue types among  
290 our validation samples. Demonstrable capture was identified for all transcripts on the selector in  
291 at least one sample.

292

### 293 **Discussion:**

294       Though RNAseq on FFPE promises multiple advantages over DNA sequencing, it also  
295 comes with numerous challenges. This includes a low average RNA quality in FFPE specimens,  
296 and variable RNA total content and expression profile per cell. The downstream effects of these  
297 issues can be seen in highly variable on-target rates, total read pairs, and total mapped read pairs  
298 in the Fusion STAMP validation cohort. Tumor percentage estimates, while still important, are  
299 less directly related to the fraction of RNA read pairs that originate from the tumor than they  
300 would be for DNA. It is conceivable that a lowly expressed fusion could be missed despite  
301 relatively high tumor percentage, especially in a poor-quality specimen. Also, given the  
302 multiplex design, even though the hybrid capture input RNA mass per sample is constant,  
303 variable expression profiles between samples can result in disproportionate sequencing of some  
304 samples with greater RNA content aligning to the selector at the expense of other samples.

305       The sensitivity of Fusion STAMP is estimated to be around 10% tumor based on the  
306 EWSR1 cell line dilution study performed during validation; however, this sensitivity is  
307 expected to vary significantly by the hybrid capture efficiency of the involved genes, the fusion  
308 transcript expression level, and the specimen quality. One false negative was identified in the  
309 validation cohort and appears likely to relate to low tumor percent due to lack of enrichment, and

310 poor RNA quality. However, Fusion STAMP demonstrated high sensitivity for fusion detection  
311 overall.

312 False positive results may be caused by intergenic splicing<sup>21</sup>, barcode hopping / index  
313 hopping<sup>22</sup>, or misalignment. These findings are expected to vary depending on the expression  
314 profile of the sample, and therefore will likely vary by the site of origin of the tissue. The full  
315 range of human tissue types is near-impossible to comprehensively assess during validation.  
316 Several tissue types were tested during validation including lung, gastrointestinal tract, and soft  
317 tissue, and no false positives were detected above the reporting thresholds. As clinical testing  
318 continues and more tissue types are sequenced, recurrent artifacts will be prospectively tracked,  
319 identified, and/or filtered.

320 Multiple RNA NGS sequencing quality control strategies and metrics have been  
321 described in the literature. These include spike-in control transcripts and corresponding probes to  
322 assess efficiency of hybrid capture and indirectly assess RNA quality<sup>11</sup>; probes to RNA from  
323 housekeeping genes to assess RNA quality<sup>11</sup>; a minimum total mapped read count<sup>10,11,13</sup>; a  
324 minimum on-target rate<sup>11</sup>; a minimum mapped exon-exon junction read count<sup>10</sup>; a percent of  
325 mapped reads that map to coding regions<sup>10</sup>; and qPCR-based assessment of RNA quality<sup>13</sup>. The  
326 utility of these metrics needs to be weighed against the theoretical possibility of detecting a  
327 highly expressed fusion despite poor quality, or of missing a lowly expressed fusion despite high  
328 quality. This makes it challenging to have an accurate assessment of the risk of a false positive or  
329 negative result in any individual case. For this Fusion STAMP validation cohort, despite  
330 employing only run-level QC criteria and sample-specific total mapped reads QC cutoffs, after  
331 optimizing reporting cutoffs to exclude noise and include real events as confirmed by ancillary

332 testing, the cohort demonstrates a high sensitivity, specificity, precision and accuracy for  
333 qualitative fusion detection.

334

335 **Conclusions:**

336 Fusion STAMP is a hybrid-capture based RNAseq assay (run on the Illumina MiSeq) that  
337 fully targets the transcript isoforms of 43 genes selected on the basis of their known impact as  
338 actionable targets of existing and emerging anti-cancer therapies, their prognostic features,  
339 and/or their utility as diagnostic cancer biomarkers. Despite challenges related to sequencing  
340 RNA from FFPE tissue, after optimizing cutoffs to exclude noise and include real events, this  
341 validation cohort demonstrates a high sensitivity, specificity, precision and accuracy for fusion  
342 detection. This assay is expected to provide clinical utility in the setting of NSCLC, particularly  
343 those negative for any known driver mutation; sarcomas, especially small round blue cell tumors,  
344 or others that are difficult to classify; and select head and neck entities, including certain thyroid  
345 and salivary gland tumors.

346

347 **Acknowledgements:** All authors contributed to the study design. C.J., S.S., H.Z. and H.A.C.  
348 performed the benchwork experiments. E.F. and H.A.C. performed the computational analyses.  
349 All authors contributed to the final draft of the manuscript. H.A.C. is the guarantor of this work,  
350 and, as such, had full access to all of the data in the study and takes responsibility for the  
351 integrity of the data and the accuracy of the data analysis.

352

353 **References:**

354 1. Fletcher, C. D.M., Bridge, J.A., Hogendoorn, P., Mertens F, editor. WHO Classification of

- 355 Tumours of Soft Tissue and Bone. 4th Editio. Lyon, France, International Agency for  
356 Research on Cancer, 2013
- 357 2. Lindeman NI, Cagle PT, Aisner DL, Arcila ME, Beasley MB, Bernicker EH, Colasacco  
358 C, Dacic S, Hirsch FR, Kerr K, Kwiatkowski DJ, Ladanyi M, Nowak JA, Sholl L,  
359 Temple-Smolkin R, Solomon B, Souter LH, Thunnissen E, Tsao MS, Ventura CB, Wynes  
360 MW, Yatabe Y. Updated molecular testing guideline for the selection of lung cancer  
361 patients for treatment with targeted tyrosine kinase inhibitors guideline from the college of  
362 American pathologists, the international association for the study of lung cancer, and the  
363 association for molecular pathology. Arch. Pathol. Lab. Med., vol. 142, College of  
364 American Pathologists, 2018, pp. 321–46
- 365 3. Schram AM, Chang MT, Jonsson P, Drilon A. Fusions in solid tumours: Diagnostic  
366 strategies, targeted therapy, and acquired resistance. Nat Rev Clin Oncol, 2017, 14:735–48
- 367 4. Yoshihara K, Wang Q, Torres-Garcia W, Zheng S, Vegesna R, Kim H, Verhaak RGW.  
368 The landscape and therapeutic relevance of cancer-associated transcript fusions.  
369 Oncogene, 2015, 34:4845–54
- 370 5. Kumar-Sinha C, Kalyana-Sundaram S, Chinnaiyan AM. Landscape of gene fusions in  
371 epithelial cancers: Seq and ye shall find. Genome Med, 2015, 7
- 372 6. Ali SM, Hensing T, Schrock AB, Allen J, Sanford E, Gowen K, Kulkarni A, He J, Suh JH,  
373 Lipson D, Elvin JA, Yelensky R, Chalmers Z, Chmielecki J, Peled N, Klempner SJ,  
374 Firozvi K, Frampton GM, Molina JR, Menon S, Brahmer JR, MacMahon H, Nowak J, Ou  
375 S-HI, Zauderer M, Ladanyi M, Zakowski M, Fischbach N, Ross JS, Stephens PJ, Miller  
376 VA, Wakelee H, Ganesan S, Salgia R. Comprehensive Genomic Profiling Identifies a  
377 Subset of Crizotinib-Responsive *ALK* -Rearranged Non-Small Cell Lung Cancer Not



- 378 Detected by Fluorescence In Situ Hybridization. *Oncologist*, 2016, 21:762–70
- 379 7. Rosenbaum JN, Bloom R, Forys JT, Hiken J, Armstrong JR, Branson J, McNulty S, Velu  
380 PD, Pepin K, Abel H, Cottrell CE, Pfeifer JD, Kulkarni S, Govindan R, Konnick EQ,  
381 Lockwood CM, Duncavage EJ. Genomic heterogeneity of ALK fusion breakpoints in  
382 non-small-cell lung cancer. *Mod Pathol*, 2018, 31:791–808
- 383 8. Abel HJ, Al-Kateb H, Cottrell CE, Bredemeyer AJ, Pritchard CC, Grossmann AH,  
384 Wallander ML, Pfeifer JD, Lockwood CM, Duncavage EJ. Detection of gene  
385 rearrangements in targeted clinical next-generation sequencing. *J Mol Diagnostics*, 2014,  
386 16:405–17
- 387 9. Duncavage EJ, Abel HJ, Szankasi P, Kelley TW, Pfeifer JD. Targeted next generation  
388 sequencing of clinically significant gene mutations and translocations in leukemia. *Mod*  
389 *Pathol*, 2012, 25:795–804
- 390 10. Winters JL, Davila JI, McDonald AM, Nair AA, Fadra N, Wehrs RN, Thomas BC,  
391 Balcom JR, Jin L, Wu X, Voss JS, Klee EW, Oliver GR, Graham RP, Neff JL, Rumilla  
392 KM, Aypar U, Kipp BR, Jenkins RB, Jen J, Halling KC. Development and Verification of  
393 an RNA Sequencing (RNA-Seq) Assay for the Detection of Gene Fusions in Tumors. *J*  
394 *Mol Diagnostics*, 2018, 20:495–511
- 395 11. Reeser JW, Martin D, Miya J, Kautto EA, Lyon E, Zhu E, Wing MR, Smith A, Reeder M,  
396 Samorodnitsky E, Parks H, Naik KR, Gozgit J, Nowacki N, Davies KD, Varella-Garcia  
397 M, Yu L, Freud AG, Coleman J, Aisner DL, Roychowdhury S. Validation of a Targeted  
398 RNA Sequencing Assay for Kinase Fusion Detection in Solid Tumors. *J Mol Diagnostics*,  
399 2017, 19:682–96
- 400 12. Cieslik M, Chugh R, Wu YM, Wu M, Brennan C, Lonigro R, Su F, Wang R, Siddiqui J,

- 401 Mehra R, Cao X, Lucas D, Chinnaiyan AM, Robinson D. The use of exome capture RNA-  
402 seq for highly degraded RNA with application to clinical cancer sequencing. *Genome Res*,  
403 2015, 25:1372–81
- 404 13. Zhu G, Benayed R, Ho C, Mullaney K, Sukhadia P, Rios K, Berry R, Rubin BP, Nafa K,  
405 Wang L, Klimstra DS, Ladanyi M, Hameed MR. Diagnosis of known sarcoma fusions and  
406 novel fusion partners by targeted RNA sequencing with identification of a recurrent  
407 ACTB-FOSB fusion in pseudomyogenic hemangioendothelioma. *Mod Pathol*, 2018.  
408 <https://doi.org/10.1038/s41379-018-0175-7>
- 409 14. Wang F, Wang L, Briggs C, Sicinska E, Gaston SM, Mamon H, Kulke MH, Zamponi R,  
410 Loda M, Maher E, Ogino S, Fuschs CS, Li J, Hader C, Makrigiorgos GM. DNA  
411 degradation test predicts success in whole-genome amplification from diverse clinical  
412 samples. *J Mol Diagnostics*, 2007, 9:441–51
- 413 15. Srinivasan M, Sedmak D, Jewell S. Review Effect of Fixatives and Tissue Processing on  
414 the Content and Integrity of Nucleic Acids. vol. 161. 2002
- 415 16. Lawson ARJ, Hindley GFL, Forshew T, Tatevossian RG, Jamie GA, Kelly GP, Neale GA,  
416 Ma J, Jones TA, Ellison DW, Sheer D. RAF gene fusion breakpoints in pediatric brain  
417 tumors are characterized by significant enrichment of sequence microhomology. *Genome*  
418 *Res*, 2011, 21:505–14
- 419 17. Kalyana-Sundaram S, Shankar S, DeRoo S, Iyer MK, Palanisamy N, Chinnaiyan AM,  
420 Kumar-Sinha C. Gene Fusions Associated with Recurrent Amplicons Represent a Class of  
421 Passenger Aberrations in Breast Cancer. *Neoplasia*, 2015, 14:702-IN13
- 422 18. Dobin A, Davis CA, Schlesinger F, Drenkow J, Zaleski C, Jha S, Batut P, Chaisson M,  
423 Gingeras TR. STAR: Ultrafast universal RNA-seq aligner. *Bioinformatics*, 2013, 29:15–

- 424 21
- 425 19. Nybakken GE, Bala R, Gratzinger D, et al. Isolated Follicles Enriched for Centroblasts  
426 and Lacking t(14;18)/BCL2 in Lymphoid Tissue: Diagnostic and Clinical Implications.  
427 Pagano JS, ed. *PLoS ONE*. 2016;11(3):e0151735. doi:10.1371/journal.pone.0151735.
- 428 20. Missiaglia E, Williamson D, Chisholm J, Wirapati P, Pierron G, Petel F, Concordet JP,  
429 Thway K, Oberlin O, Pritchard-Jones K, Delattre O, Delorenzi M, Shipley J.  
430 PAX3/FOXO1 fusion gene status is the key prognostic molecular marker in  
431 rhabdomyosarcoma and significantly improves current risk stratification. *J Clin Oncol*,  
432 2012, 30:1670–7
- 433 21. Jividen K, Li H. Chimeric RNAs generated by intergenic splicing in normal and cancer  
434 cells. *Genes Chromosom Cancer*, 2014, 53:963–71
- 435 22. Illumina. Effects of Index Misassignment on Multiplexing and Downstream Analysis.  
436 Illumina, 2017:1–4
- 437
- 438
- 439
- 440
- 441
- 442
- 443
- 444
- 445
- 446

447

448

449

450

451

452

453 **Table 1:** Fusion-STAMP gene panel with affiliated cancer(s) and clinical utility.

| Gene | Canonical RefSeq Transcript (length in bp) | Translocation or Other Alteration | Affiliated Cancer(s)                | Clinical Utility      | Actionable Therapy                                                                                                                                                          |
|------|--------------------------------------------|-----------------------------------|-------------------------------------|-----------------------|-----------------------------------------------------------------------------------------------------------------------------------------------------------------------------|
| ALK  | NM_004304.4 (6267)                         | EML4-ALK and others               | Non-small cell lung carcinoma       | Predictive            | <u>FDA Approved:</u> Crizotinib, Brigatinib, Alectinib, Ceritinib<br><u>Under Investigation:</u> Lorlatinib, Entrectinib, Belizatinib, Ensartinib CEP-37440                 |
|      |                                            |                                   | Inflammatory myofibroblastic tumor  | Diagnostic Predictive | <u>Standard of Care:</u> Crizotinib, Ceritinib                                                                                                                              |
|      |                                            | NPM1-ALK                          | ALK+ anaplastic large cell lymphoma | Diagnostic Predictive | <u>Under Investigation:</u> ALK inhibitors                                                                                                                                  |
| ROS1 | NM_002944.2 (7368)                         | ROS1 fusions                      | Non-small cell lung carcinoma       | Predictive            | <u>FDA Approved:</u> Crizotinib<br><u>Under Investigation:</u> Entrectinib, Ceritinib                                                                                       |
| MET  | NM_000245.2 (6641)                         | MET fusions                       | Gliomas                             | Predictive            | --                                                                                                                                                                          |
| RET  | NM_020975.4 (5629)                         | RET fusions                       | Non-small cell lung carcinoma       | Predictive            | <u>FDA Breakthrough:</u> LOXO-292<br><u>Standard of Care:</u> Cabozantinib, Vandetanib<br><u>Under Investigation:</u> Lenvatinib, Ponatinib, Sunitinib, Sorafenib, Apatinib |
| EGFR | NM_005228.3 (5616)                         | EGFR fusions                      | Non-small cell lung carcinoma       | Predictive            | <u>Under Investigation:</u> Erlotinib                                                                                                                                       |
| NRG1 | NM_013964.3 (3078)                         | NRG1 fusions                      | Non-small cell lung carcinoma       | Predictive            | <u>Under Investigation:</u> Afatinib                                                                                                                                        |

|             |                       |                                 |                                                     |                                                  |                                                                                                                                    |
|-------------|-----------------------|---------------------------------|-----------------------------------------------------|--------------------------------------------------|------------------------------------------------------------------------------------------------------------------------------------|
| RAF1 (CRAF) | NM_002880.3 (3291)    | RAF1 fusions                    | Multiple solid tumor types                          | Predictive                                       | <u>Under Investigation:</u> LXH254, LY3009120, MEK inhibitors                                                                      |
| BRAF        | NM_004333.4 (2949)    | BRAF fusions                    | Melanoma                                            | Predictive                                       | <u>Under Investigation:</u> Second-generation BRAF inhibitors (PLX7904, PLX8394, LXH254), MEK inhibitors (Cobimetinib, Trametinib) |
|             |                       |                                 | Ovarian cancer                                      | Predictive                                       |                                                                                                                                    |
|             |                       |                                 | Other solid tumors                                  | Predictive                                       |                                                                                                                                    |
| COL1A1      | NM_000088.3 (5927)    | COL1A1-PDGFB                    | Dermatofibrosarcoma protuberans                     | Diagnostic Predictive                            | <u>Under Investigation:</u> Imatinib                                                                                               |
| PDGFB       | NM_002608.3 (3801)    |                                 |                                                     |                                                  |                                                                                                                                    |
| FGFR1       | NM_023110.2 (5917)    | FGFR1, FGFR2, and FGFR3 fusions | Multiple solid tumor types                          | Predictive                                       | <u>Under Investigation:</u> AZD4547, Erdafitinib, BGJ398, Debio1347, Infigratinib, ARQ-087                                         |
| FGFR2       | NM_000141.4 (4654)    |                                 |                                                     |                                                  |                                                                                                                                    |
| FGFR3       | NM_000142.4 (4304)    |                                 |                                                     |                                                  |                                                                                                                                    |
| NTRK1       | NM_002529.3 (2663)    | NTRK1, NTRK2, and NTRK3 fusions | Multiple solid tumor types                          | Predictive                                       | <u>FDA Approved:</u> Larotrectinib<br><u>Under Investigation:</u> Entrectinib                                                      |
| NTRK2       | NM_001018064.2 (8498) |                                 |                                                     |                                                  |                                                                                                                                    |
| NTRK3       | NM_001012338.2 (3004) |                                 |                                                     |                                                  |                                                                                                                                    |
| ETV6        | NM_001987.4 (5989)    | ETV6-NTRK3                      | Infantile fibrosarcoma                              | Diagnostic                                       | --                                                                                                                                 |
|             |                       |                                 | Congenital mesoblastic nephroma                     | Diagnostic                                       | --                                                                                                                                 |
|             |                       |                                 | Secretory carcinoma of breast and of salivary gland | Diagnostic                                       | --                                                                                                                                 |
| BCOR        | NM_001123385.1 (6434) | BCOR-CCNB3                      | Ewing-like sarcoma, BCOR-rearranged                 | Diagnostic Prognostic (similar to Ewing sarcoma) | --                                                                                                                                 |
| CCNB3       | NM_033031.2 (4524)    |                                 |                                                     |                                                  |                                                                                                                                    |
| CIC         | NM_001304815.1 (8245) | CIC-DUX4                        | Ewing-like sarcoma, CIC-rearranged                  | Diagnostic Prognostic (worse than Ewing sarcoma) |                                                                                                                                    |
| CAMTA1      | NM_015215.3 (8444)    | WWTR1-CAMTA1                    | Epithelioid hemangioendothelioma                    | Diagnostic                                       | --                                                                                                                                 |
| ERG         | NM_001136154.1 (5114) | TMPRSS2-ERG                     | Ewing sarcoma                                       | Diagnostic                                       | --                                                                                                                                 |
| DDIT3       | NM_004083.5 (924)     | FUS-DDIT3, EWSR1-DDIT3          | Myxoid liposarcoma                                  | Diagnostic                                       | --                                                                                                                                 |
| FUS         | NM_004960.3           |                                 |                                                     |                                                  |                                                                                                                                    |

|             |                       |                        |                                                        |                                    |                                     |            |    |
|-------------|-----------------------|------------------------|--------------------------------------------------------|------------------------------------|-------------------------------------|------------|----|
|             | (5119)                | FUS-CREB3L2            | Low grade fibromyxoid sarcoma                          | Diagnostic                         | --                                  |            |    |
|             |                       | FUS-ATF1               | Angiomatoid fibrous histiocytoma                       | Diagnostic                         | --                                  |            |    |
| ATF1        | NM_005171.4 (2505)    |                        | Clear cell sarcoma                                     | Diagnostic                         | --                                  |            |    |
|             |                       | EWSR1-ATF1             | Angiomatoid fibrous histiocytoma                       | Diagnostic                         | --                                  |            |    |
|             |                       |                        | Hyalinizing clear cell carcinoma of the salivary gland | Diagnostic                         | --                                  |            |    |
| EWSR1, FLI1 | NM_002017.4 (3995)    | EWSR1-FLI1             | Ewing sarcoma                                          | Diagnostic                         | --                                  |            |    |
|             |                       | EWSR1-DDIT3            | Myxoid liposarcoma                                     | Diagnostic                         | --                                  |            |    |
|             |                       | EWSR1-NR4A3            | Extraskeletal myxoid chondrosarcoma                    | Diagnostic                         | --                                  |            |    |
|             |                       |                        | Angiomatoid fibrous histiocytoma                       | Diagnostic                         | --                                  |            |    |
|             |                       | EWSR1-CREB1            | Primary pulmonary myxoid sarcoma                       | Diagnostic                         | --                                  |            |    |
|             |                       |                        |                                                        |                                    |                                     | --         |    |
|             |                       |                        |                                                        | EWSR1-WT1                          | Desmoplastic small round cell tumor | Diagnostic | -- |
|             |                       | WT1                    | NM_024426.4 (3037)                                     |                                    |                                     |            | -- |
| PAX3        | NM_181457.3 (2032)    | PAX3-FOXO1, PAX7-FOXO1 | Alveolar rhabdomyosarcoma                              | Diagnostic<br>Prognostic (adverse) | --                                  |            |    |
| PAX7        | NM_001135254.1 (6053) |                        |                                                        |                                    |                                     |            |    |
| FOXO1       | NM_002015.3 (5738)    |                        |                                                        |                                    |                                     |            |    |
| NAB2        | NM_005967.3 (2725)    | NAB2-STAT6             | Solitary fibrous tumor                                 | Diagnostic                         | --                                  |            |    |
| STAT6       | NM_001178078.1 (4050) |                        |                                                        |                                    |                                     |            |    |
| NCOA2       | NM_006540.2 (6157)    | HEY1-NCOA2             | Mesenchymal chondrosarcoma                             | Diagnostic                         | --                                  |            |    |
| PHF1        | NM_024165.2 (2312)    | EP400-PHF1             | Ossifying fibromyxoid tumor                            | Diagnostic                         | --                                  |            |    |
| SSX1        | NM_001278691.1 (1402) | SSX2-SS18, SSX1-SS18   | Synovial sarcoma                                       | Diagnostic                         | --                                  |            |    |
| SS18        | NM_001007559.2 (3440) |                        |                                                        |                                    |                                     |            |    |
| TFE3        | NM_006521.5 (3467)    | ASPL-TFE3              | Translocation carcinoma of kidney                      | Diagnostic<br>Prognostic (adverse) | --                                  |            |    |
|             |                       |                        | Alveolar soft parts sarcoma                            | Diagnostic                         | --                                  |            |    |
| USP6        | NM_004505.3 (7993)    | CDH11-USP6 and others  | Aneurysmal bone cyst                                   | Diagnostic                         | --                                  |            |    |
|             |                       | MYH9-USP6 and others   | Nodular fasciitis                                      | Diagnostic                         | --                                  |            |    |

|       |                       |               |                                                   |                                         |    |
|-------|-----------------------|---------------|---------------------------------------------------|-----------------------------------------|----|
| HMGA2 | NM_003483.4<br>(4150) | HMGA2 fusions | Pleomorphic adenoma                               | Diagnostic                              | -- |
|       |                       |               | Carcinoma ex pleomorphic adenoma                  | Diagnostic                              | -- |
| MYB   | NM_005375.3<br>(3315) | MYB-NFIB      | Adenoid cystic carcinoma                          | Diagnostic                              | -- |
| PPARG | NM_015869.4<br>(1820) | PAX8-PPARG    | Follicular thyroid carcinoma                      | Diagnostic<br>Prognostic<br>(favorable) | -- |
|       |                       |               | Follicular variant of papillary thyroid carcinoma | Diagnostic                              | -- |
|       |                       |               | Follicular adenoma                                | Diagnostic                              | -- |
| YWHAE | NM_006761.4<br>(1827) | YWHAE-FAM22   | Endometrial stromal sarcoma, high grade           | Diagnostic<br>Prognostic<br>(adverse)   | -- |

454

455

456

457

458

459

460

461

462

463

464

465

466

467

468

469

470

471

472

473

474



475 **Table 2:** Sample pathological and sequencing metrics from Fusion-STAMP validation data. Abbreviations: FISH, fluorescent in situ  
 476 hybridization; FFPE, formalin fixed paraffin embedded; STAMP, Stanford Actionable Mutation Panel; IHC, immunohistochemistry;  
 477 AMP, anchored multiplex PCR; NGS, next generation sequencing; ddPCR, digital droplet polymerase chain reaction.

| Sample Number | Diagnosis                            | Tissue Type | Tumor Percentage (%) | On-Target Rate (%) | Total Read Pairs | Total Mapped Read Pairs | Median Insert Size (bp) | Reference Method | Fusion(s) Detected by Fusion-STAMP | Result |
|---------------|--------------------------------------|-------------|----------------------|--------------------|------------------|-------------------------|-------------------------|------------------|------------------------------------|--------|
| 1             | Adenoid cystic carcinoma             | FFPE        | Unknown              | 82.4               | 6,091,887        | 4,033,771               | 194                     | FISH (MYB)       | EWSR1-MYB                          | TP     |
| 2             | Round cell liposarcoma               | FFPE        | Unknown              | 73.6               | 3,361,055        | 2,573,249               | 231                     | FISH (FUS)       | DDIT3-FUS                          | TP     |
| 3             | Inflammatory myofibroblastic tumor   | FFPE        | 20                   | 86.5               | 5,790,815        | 4,211,070               | 251                     | FISH (ALK)       | CLTC-ALK                           | TP     |
| 4             | Extraskeletal myxoid chondrosarcoma  | FFPE        | 60                   | 40.1               | 3,278,632        | 1,424,224               | 162                     | FISH (EWSR1)     | EWSR1-NR4A3                        | TP     |
| 5             | Synovial sarcoma                     | FFPE        | 90                   | 61.0               | 5,370,991        | 3,071,753               | 178                     | FISH (SS18)      | SS18-SSX2                          | TP     |
| 6             | Mammary analogue secretory carcinoma | FFPE        | 30                   | 28.6               | 2,014,943        | 520,259                 | 144                     | FISH (ETV6)      | NTRK3-ETV6                         | TP     |
| 7             | Angiomatoid fibrous histiocytoma     | FFPE        | 30                   | 87.6               | 8,811,208        | 4,679,123               | 217                     | FISH (EWSR1)     | EWSR1-CREB1                        | TP     |
| 8             | Lung adenocarcinoma                  | FFPE        | 30                   | 63.8               | 3,366,719        | 1,698,839               | 192                     | STAMP (EML4-ALK) | EML4-ALK                           | TP     |
| 9             | Adenoid cystic carcinoma             | FFPE        | Unknown              | 34.5               | 3,201,447        | 1,687,063               | 170                     | FISH (MYB)       | MYB-NFIB                           | TP     |
| 10            | Solitary fibrous tumor, malignant    | FFPE        | 80                   | 47.7               | 4,645,678        | 2,202,900               | 154                     | IHC (STAT6)      | NAB2-STAT6                         | TP     |
| 11            | Synovial sarcoma                     | FFPE        | 80                   | 64.9               | 5,232,246        | 3,433,244               | 193                     | FISH (SS18)      | SS18-SSX2                          | TP     |
| 12            | Alveolar soft part                   | FFPE        | 60                   | 69.5               | 5,196,767        |                         | 201                     | FISH (TFE3)      | ASPSCR1-TFE3                       | TP     |

|    |                                                                     |      |         |      |           |           |     |                                           |                          |    |
|----|---------------------------------------------------------------------|------|---------|------|-----------|-----------|-----|-------------------------------------------|--------------------------|----|
|    | sarcoma                                                             |      |         |      |           | 3,403,879 |     |                                           |                          |    |
| 13 | Lung adenocarcinoma                                                 | FFPE | 50      | 52.0 | 2,357,548 | 1,171,268 | 188 | STAMP (MYO5C-ROS1)                        | MYO5C-ROS1               | TP |
| 14 | Lung adenocarcinoma                                                 | FFPE | 60      | 55.0 | 2,875,396 | 1,036,438 | 165 | STAMP (KIF5B-RET)                         | KIF5B-RET                | TP |
| 15 | Papillary thyroid carcinoma                                         | FFPE | 90      | 76.2 | 5,101,194 | 3,094,816 | 202 | STAMP (EML4-ALK)                          | EML4-ALK                 | TP |
| 16 | Dedifferentiated liposarcoma                                        | FFPE | Unknown | 83.9 | 539,759   | 298,880   | 175 | External NGS (HMGA2 rearrangement exon 3) | HMGA2-LUM                | TP |
| 17 | Myeloid neoplasm with eosinophilia                                  | FFPE | Unknown | 47.9 | 3,098,223 | 1,686,619 | 165 | FISH (FGFR1)                              | TPR-FGFR1<br>ZMYM2-FGFR1 | TP |
| 18 | Pilocytic astrocytoma                                               | FFPE | 40      | 78.5 | 4,776,729 | 3,455,673 | 218 | STAMP (KIAA1549-BRAF)                     | KIAA1549-BRAF            | TP |
| 19 | Unknown                                                             | FFPE | Unknown | 75.5 | 6,199,079 | 3,117,896 | 160 | External AMP (CCD6-RET)                   | CCD6-RET                 | TP |
| 20 | Unknown                                                             | FFPE | Unknown | 84.3 | 4,334,590 | 2,612,327 | 169 | External AMP (KIF5B-RET)                  | KIF5B-RET                | TP |
| 21 | Fibro-osseous pseudotumor                                           | FFPE | Unknown | 73.1 | 6,610,133 | 3,589,148 | 206 | External FISH (USP6) - negative           | COL1A1-USP6              | FP |
| 22 | Unknown                                                             | FFPE | Unknown | 70.5 | 6,033,595 | 3,865,529 | 203 | External AMP (MET ex14)                   | NEGATIVE                 | TN |
| 23 | Unknown                                                             | FFPE | Unknown | 70.4 | 6,836,190 | 3,047,840 | 167 | External AMP (MET ex14)                   | NEGATIVE                 | TN |
| 24 | Unknown                                                             | FFPE | Unknown | 75.9 | 3,197,111 | 2,041,473 | 201 | External AMP (EML4-ALK)                   | NEGATIVE                 | FN |
| 25 | Acute myeloid leukemia arising from eosinophilic myeloproliferative | FFPE | 4       | 43.0 | 2,517,711 | 624,988   | 144 | STAMP (FIP1L1-PDGFR)                      | NEGATIVE                 | TN |

bioRxiv preprint doi: <https://doi.org/10.1101/870634>; this version posted December 10, 2019. The copyright holder for this preprint (which was not certified by peer review) is the author/funder, who has granted bioRxiv a license to display the preprint in perpetuity. It is made available under aCC-BY-NC-ND 4.0 International license.

|    |                                                                           |      |     |      |            |           |     |                                                    |                                                                  |    |
|----|---------------------------------------------------------------------------|------|-----|------|------------|-----------|-----|----------------------------------------------------|------------------------------------------------------------------|----|
|    | neoplasm                                                                  |      |     |      |            |           |     |                                                    |                                                                  |    |
| 26 | Clear cell renal cell carcinoma                                           | FFPE | 60  | 85.0 | 5,738,916  | 4,291,356 | 243 | STAMP<br>(NEGATIVE)                                | NEGATIVE                                                         | TN |
| 27 | Lung adenocarcinoma                                                       | FFPE | 80  | 85.0 | 5,206,099  | 3,519,763 | 208 | STAMP<br>(NEGATIVE)                                | NEGATIVE                                                         | TN |
| 28 | Salivary gland carcinoma                                                  | FFPE | 30  | 89.4 | 1,771,590  | 1,363,295 | 210 | STAMP<br>(NEGATIVE)                                | NEGATIVE                                                         | TN |
| 29 | Lung adenocarcinoma                                                       | FFPE | 70  | 84.9 | 5,168,406  | 3,845,247 | 237 | STAMP<br>(NEGATIVE)                                | NEGATIVE                                                         | TN |
| 30 | Anaplastic oligodendroglioma                                              | FFPE | 40  | 81.9 | 4,396,856  | 2,199,939 | 168 | STAMP<br>(NEGATIVE)                                | NEGATIVE                                                         | TN |
| 31 | Appendiceal mucinous adenocarcinoma                                       | FFPE | 10  | 93.0 | 1,124,2774 | 8,530,449 | 269 | STAMP<br>(NEGATIVE)                                | NEGATIVE                                                         | TN |
| 32 | Horizon 5-Fusion Multiplex (Positive Control) FFPE RNA Reference Standard | FFPE | --- | 69.2 | 5,206,194  | 3,800,859 | 226 | Horizon Discovery:<br>positive at 5 certified loci | SLC34A2-ROS1<br>ETV6-NTRK3<br>CCD6-RET<br>TPM3-NTRK1<br>EML4-ALK | TP |
| 33 | Horizon 5-Fusion Multiplex (Negative Control) FFPE RNA Reference Standard | FFPE | --- | 66.7 | 4,149,750  | 2,863,989 | 211 | Horizon Discovery:<br>negative at 5 certified loci | NEGATIVE                                                         | TN |

|    |                           |     |     |      |           |           |     |                 |                                                                                                                                                                                                         |    |
|----|---------------------------|-----|-----|------|-----------|-----------|-----|-----------------|---------------------------------------------------------------------------------------------------------------------------------------------------------------------------------------------------------|----|
| 34 | Seraseq Fusion RNA Mix v3 | RNA | --- | 41.7 | 2,140,929 | 1,209,775 | 223 | ddPCR (Seraseq) | CD74-ROS1<br>EGFR-SEPT14<br>EML4-ALK<br>ETV6-NTRK3<br>FGFR3-BAIAP2L1<br>FGFR3-TACC3<br>KIF5B-RET<br>LMNA-NTRK1<br>NCOA4-RET<br>PAX8-PPARG1<br>SLC34A2-ROS1<br>SLC45A3-BRAF<br>TPM3-NTRK1<br>TMPRSS2-ERG | TP |
|----|---------------------------|-----|-----|------|-----------|-----------|-----|-----------------|---------------------------------------------------------------------------------------------------------------------------------------------------------------------------------------------------------|----|

478

479 **Table 3:** Table 3: Summary of accuracy testing metrics. Each fusion call, and each negative sample, was counted as one call.

480 Abbreviations: TP, true positive; FP, false positive; FN, false negative; TN, true negative; Sn, sensitivity; Sp, specificity; PPV,

481 positive predictive value; NPV, negative predictive value.

|                           | Fusion-STAMP Positive | Fusion-STAMP Negative | Metric  |
|---------------------------|-----------------------|-----------------------|---------|
| Reference Method Positive | 40 (TP)               | 1 (FN)                | Sn: 98% |
| Reference Method Negative | 1 (FP)                | 15 (TN)               | Sp: 94% |

|        |          |          |                    |
|--------|----------|----------|--------------------|
| Metric | PPV: 98% | NPV: 94% | Total:<br>57 calls |
|--------|----------|----------|--------------------|

482

483

484 **Figure 1:** Fusion-STAMP experimental and computational workflow.

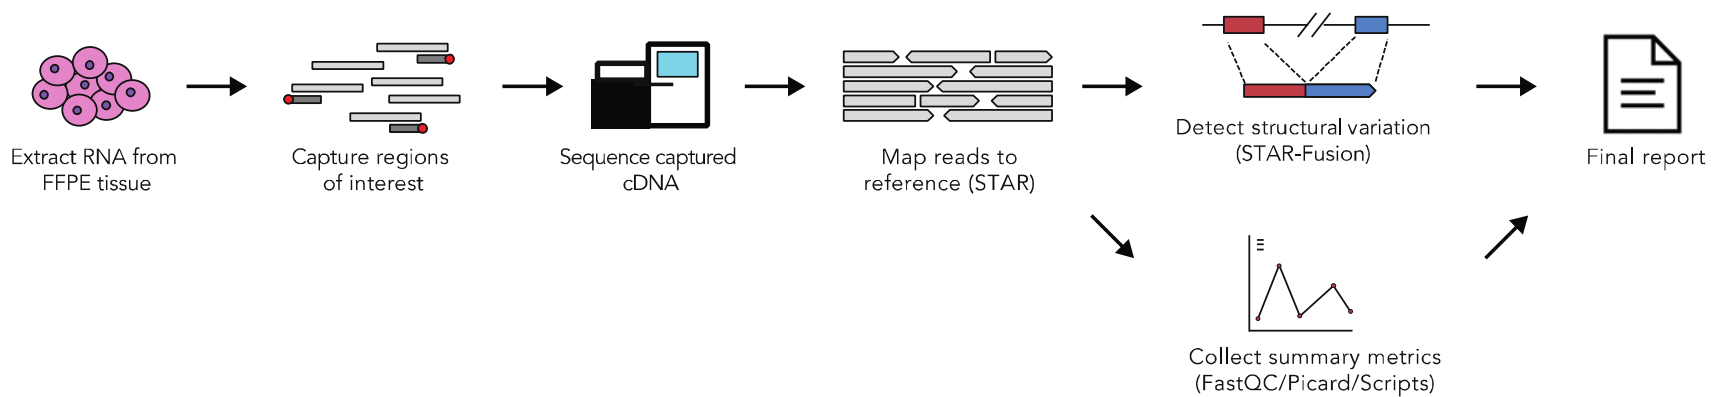

485

486 **Figure 2:** Fusion-STAMP limit of detection study. Single-replicate serial dilutions were performed using a cell line with an EWSR1

487 fusion, and a cystic fibrosis cell line.

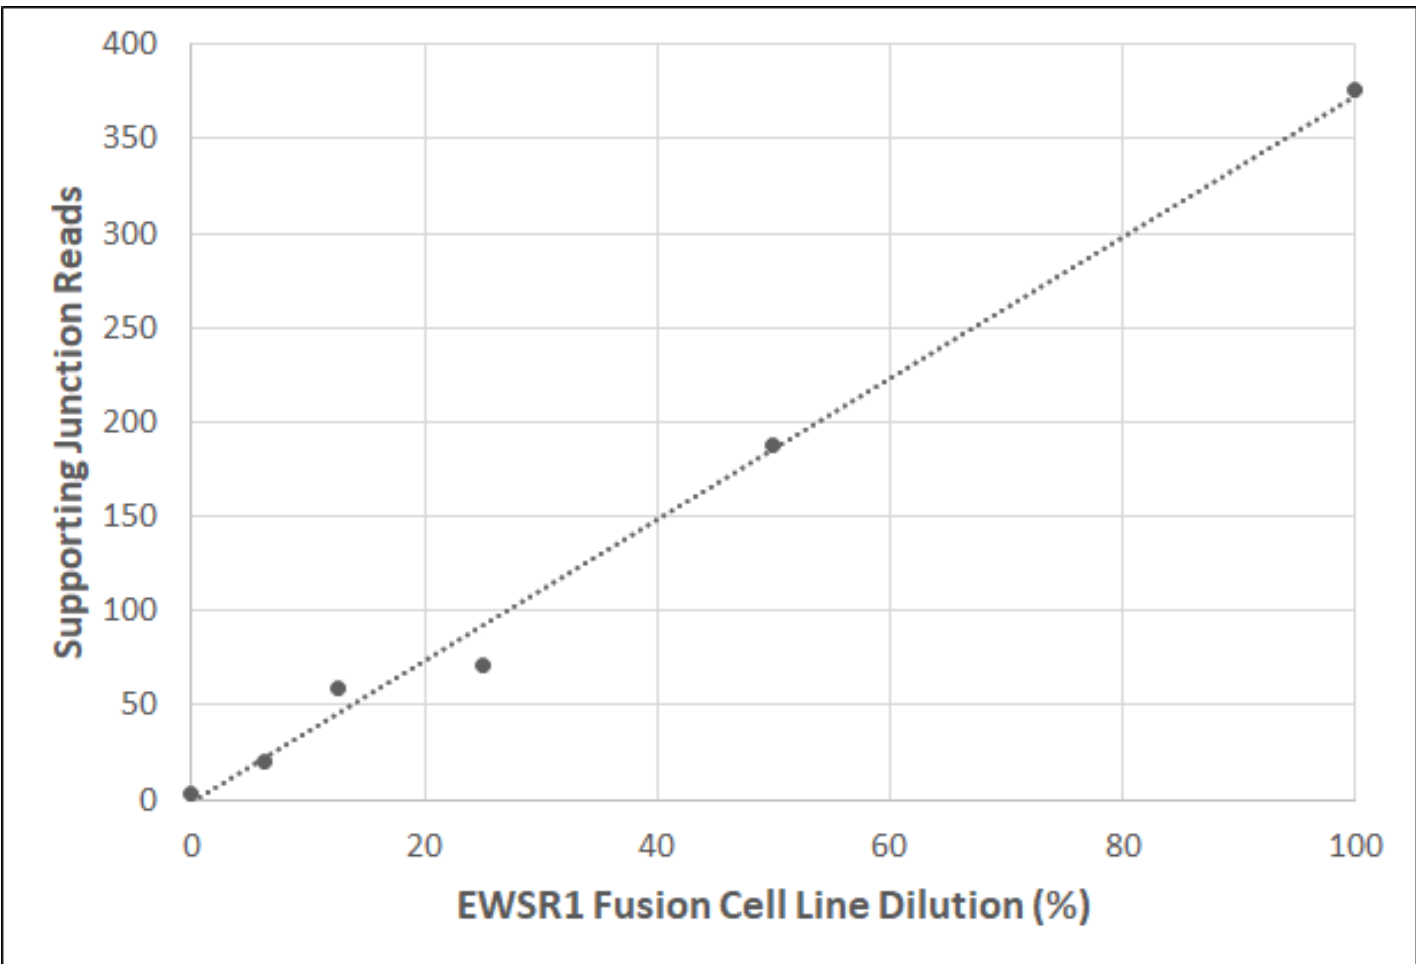

488
